# Supplementary material for: Temperature-dependent excitonic emission characteristics of lead-free inorganic double perovskites and their third-order optical nonlinearities
Source: Royal Society of Chemistry journal article supplement (doi:10.1039/d1cp04896a), 2022-01-01
Supplement: d1cp04896a1.pdf [file d1cp04896a1.pdf]

# Temperature-dependent excitonic emission characteristics of lead-free inorganic double perovskites and their third-order optical nonlinearities

Avanendra Singh,<sup>\*,†</sup> Pritam Dey,<sup>†</sup> Anupa Kumari,<sup>‡</sup> Mrinal Kanti Sikdar,<sup>‡</sup> Pratap K. Sahoo,<sup>‡</sup> Ritwick Das,<sup>‡</sup> and Tanmoy Maiti<sup>\*,†</sup>

<sup>†</sup>*Plasmonics and Perovskites Laboratory (PPL), Department of Materials Science and Engineering, Indian Institute of Technology, Kanpur, U.P., India*

<sup>‡</sup>*School of Physical Sciences, National Institute of Science Education and Research, HBNI, Bhubaneswar, Odisha, India*

E-mail: avanendr@iitk.ac.in; tmaiti@iitk.ac.in

Phone: +91 (0512) 2596994

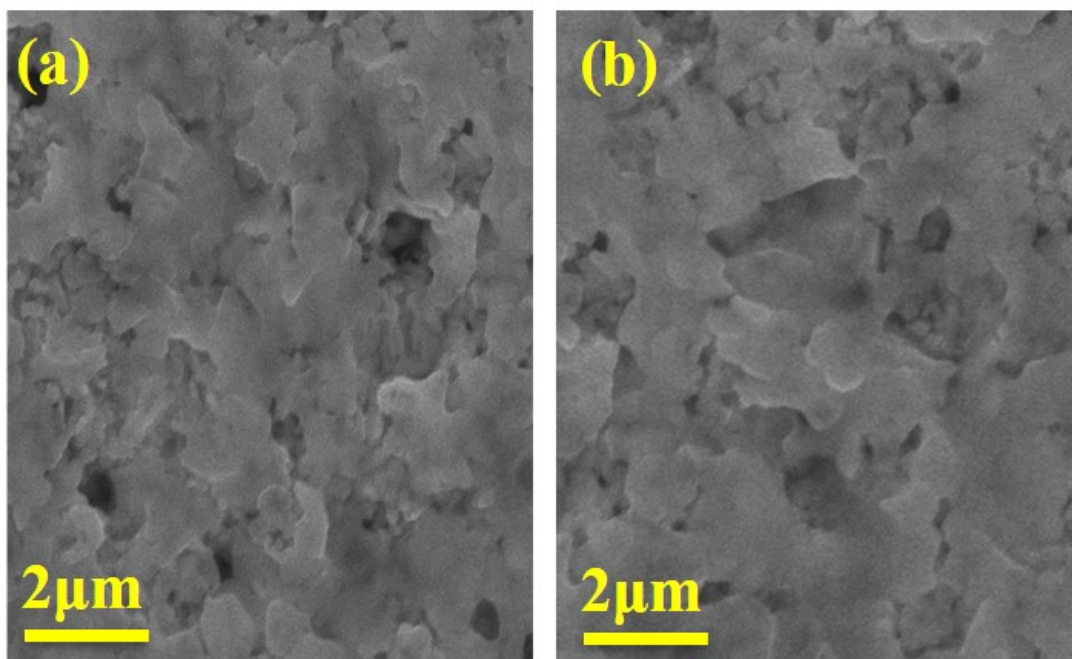

Supplementary Figure 1: (a), (b) FESEM micrographs of CNBI and CKBI perovskite films.

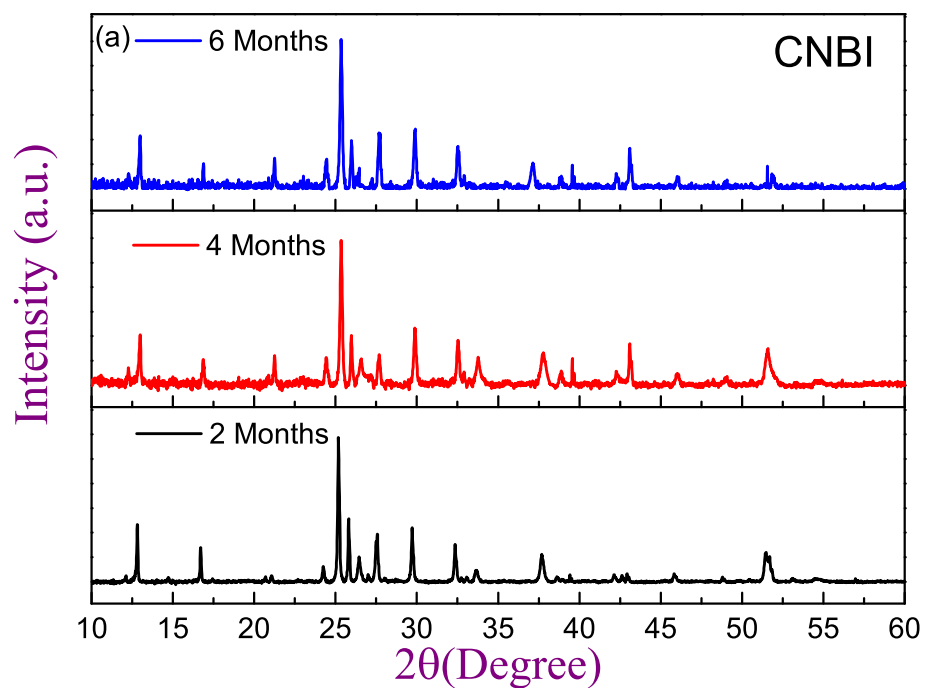

Supplementary Figure 2: Time-dependent XRD patterns of CNBI film.

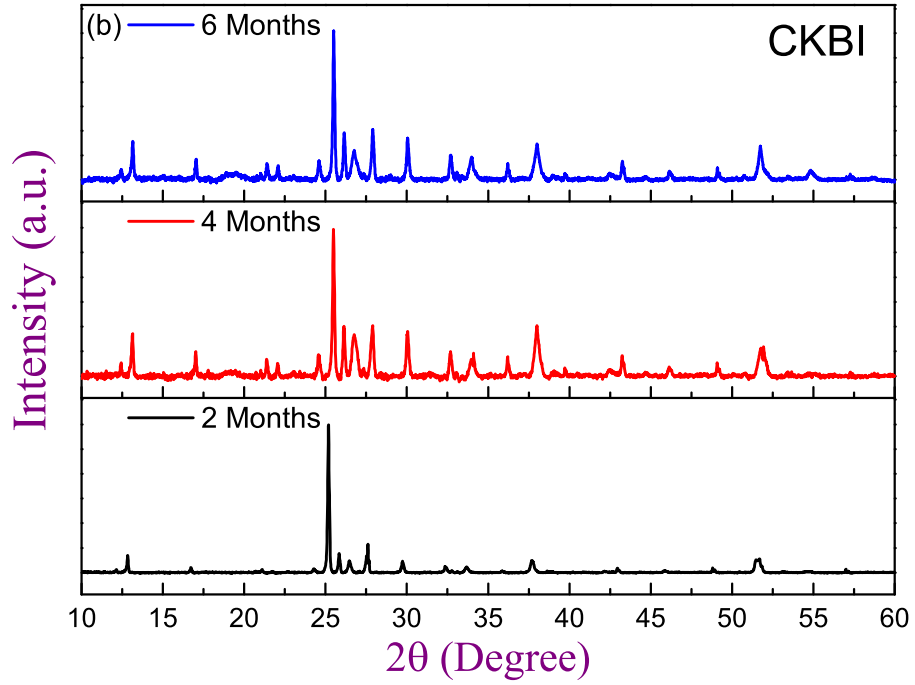

Supplementary Figure 3: Time-dependent XRD patterns of CKBI film.

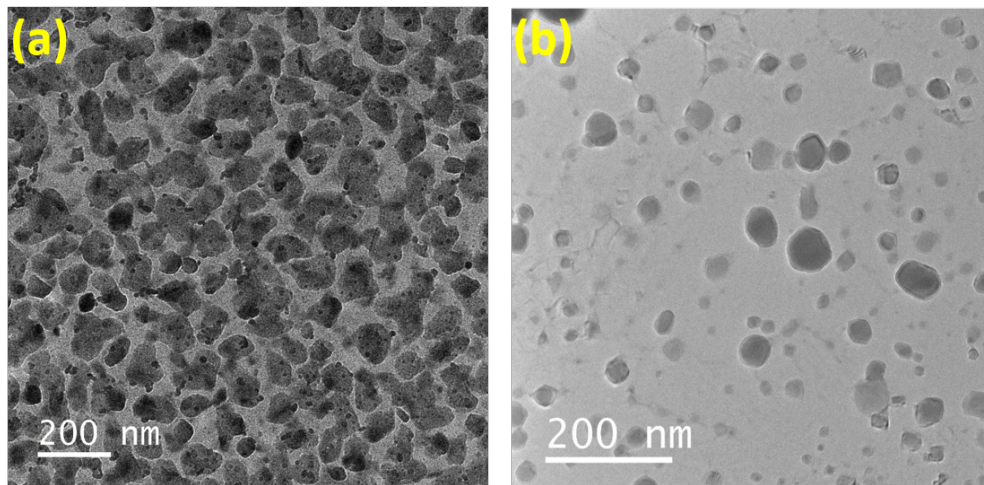

Supplementary Figure 4: (a, b) Transmission electron microscope (TEM) images of CNBI and CKBI samples, respectively.

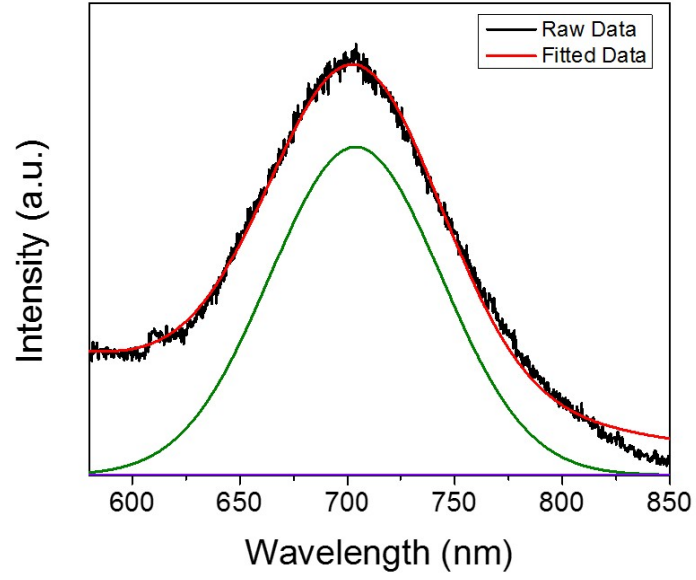

Supplementary Figure 5: Room temperature PL spectrum recorded from FTO coated glass substrate.

Table 1: Summary of NLO parameters of CNBI & CKBI perovskites at two different pump powers:

| Sample                      | Pump power ( $\text{GW}/\text{cm}^2$ ) | $n_2$ ( $\text{cm}^2\text{W}^{-1}$ ) | $\beta$ ( $\text{cm W}^{-1}$ )    |
|-----------------------------|----------------------------------------|--------------------------------------|-----------------------------------|
| $\text{Cs}_2\text{NaBiI}_6$ | 50                                     | $-0.97 \pm 0.051 \times 10^{-14}$    | $-6.08 \pm 2.44 \times 10^{-12}$  |
| $\text{Cs}_2\text{NaBiI}_6$ | 100                                    | $-1.02 \pm 0.069 \times 10^{-14}$    | $-6.21 \pm 1.06 \times 10^{-12}$  |
| $\text{Cs}_2\text{KBiI}_6$  | 50                                     | $-1.01 \pm 0.18 \times 10^{-14}$     | $-1.022 \pm 0.14 \times 10^{-12}$ |
| $\text{Cs}_2\text{KBiI}_6$  | 100                                    | $-1.27 \pm 0.26 \times 10^{-14}$     | $-1.16 \pm 0.29 \times 10^{-12}$  |

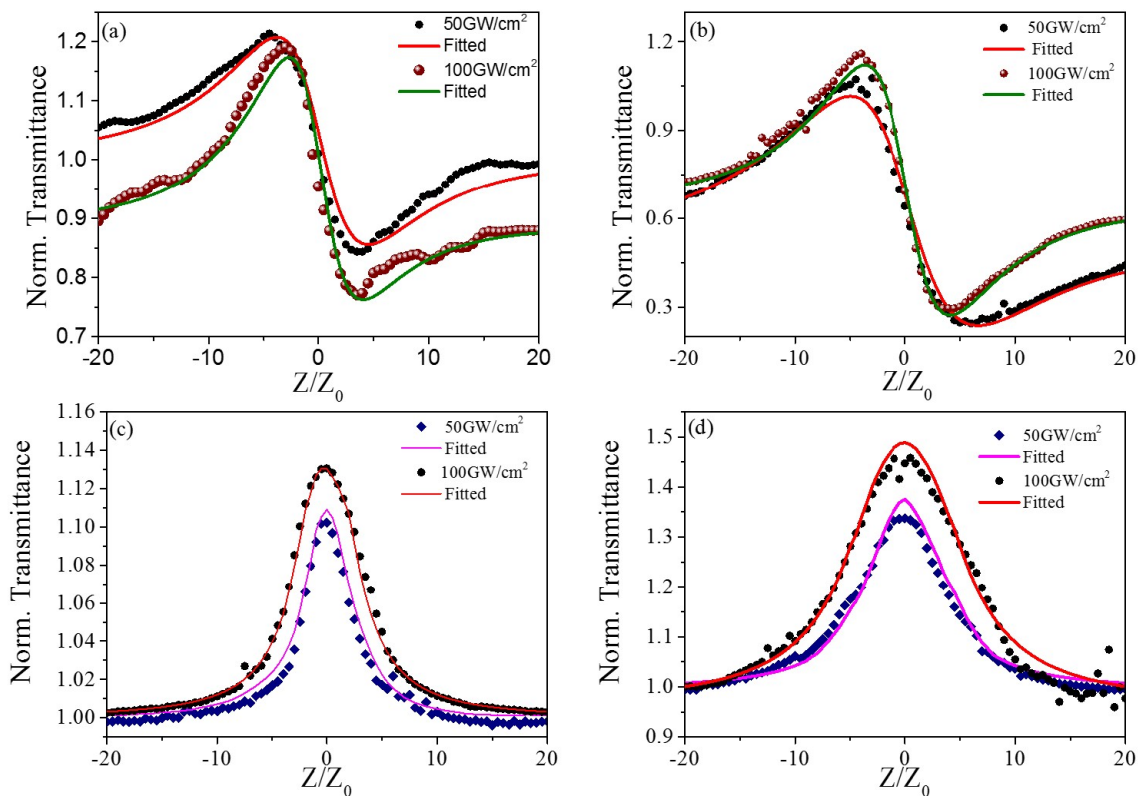

Supplementary Figure 6: (a) and (c) Z-scan traces of CNBI film recorded in CA and OA configurations, respectively. Similarly, traces of CKBI film recorded in CA and OA configurations are plotted in panels (b) and (d) (recorded at different pump powers), respectively.

## References

- (1) C. Zhang, L. Gao, S. Teo, Z. Guo, Z. Xu, S. Zhao, and T. Ma, *Sustainable Energy Fuels*, **2018**, 2, 2419.
- (2) P. Cheng, T. Wu, Y. Li, L. Jiang, W. Deng, K. Han, et al., *New J. Chem.*, **2017**, 41, 9598.
